# Supplementary material for: Challenges in recruiting and retaining adolescents with abuse-related posttraumatic stress disorder: lessons learned from a randomized controlled trial
Source: Springer Nature journal article supplement (doi:10.1186/s13034-020-00320-y), 2020-04-16
Supplement: MOESM2 [file 17902588]

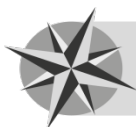

## Survey on experiences in the D-CPT trial

1. How did you become aware of the D-CPT trial? Please tick all applicable answers and add your answer below, if you can't find it in the list. Several answers are possible.

- |                                                                                         |                                                                               |
|-----------------------------------------------------------------------------------------|-------------------------------------------------------------------------------|
| <input type="checkbox"/> Recommendation by another participant                          | <input type="checkbox"/> Flyer                                                |
| <input type="checkbox"/> Recommendation by a psychiatrist                               | <input type="checkbox"/> Advertisement in a newspaper                         |
| <input type="checkbox"/> Recommendation by a general practitioner                       | <input type="checkbox"/> Article in a newspaper                               |
| <input type="checkbox"/> Recommendation by a pediatrician                               | <input type="checkbox"/> Poster                                               |
| <input type="checkbox"/> Recommendation by a gynecologist                               | <input type="checkbox"/> Recommendation by psychotherapists                   |
| <input type="checkbox"/> Recommendation by a school psychologist<br>or school counselor | <input type="checkbox"/> Recommendation by staff of an outpatient<br>clinic   |
| <input type="checkbox"/> Recommendation by a teacher                                    | <input type="checkbox"/> Recommendation by staff of a psychiatric<br>clinic   |
| <input type="checkbox"/> Recommendation by a social worker                              | <input type="checkbox"/> Recommendation by staff of a<br>psychosomatic clinic |
| <input type="checkbox"/> Recommendation by the youth welfare<br>office                  | <input type="checkbox"/> Recommendation by staff of a general<br>hospital     |
| <input type="checkbox"/> Recommendation by the local health office                      | <input type="checkbox"/> Recommendation by a counseling center                |
| <input type="checkbox"/> Recommendation by a police department                          | <input type="checkbox"/> Receiving an e-mail via a students' mailing<br>list  |
| <input type="checkbox"/> Internet search (e.g., via Google)                             | <input type="checkbox"/> Recommendation by my parents/ guardians              |
| <input type="checkbox"/> Website of the study                                           |                                                                               |
| <input type="checkbox"/> Website of the study centre                                    |                                                                               |
| <input type="checkbox"/> Facebook                                                       |                                                                               |
| <input type="checkbox"/> Other(s), namely:                                              |                                                                               |

---

---

---



**2. What were the problems for you to participate in the D-CPT trial? Please tick all applicable answers and add your answer below, if you can't find it in the list. Several answers are possible.**

- |                                                                                    |                                                                                 |
|------------------------------------------------------------------------------------|---------------------------------------------------------------------------------|
| <input type="checkbox"/> Duration of assessment appointments                       | <input type="checkbox"/> Distress caused by having to talk about painful topics |
| <input type="checkbox"/> Distress caused by fearing the results of the diagnostics | <input type="checkbox"/> Alternating interviewers                               |
| <input type="checkbox"/> Commuting time to the study site                          | <input type="checkbox"/> Video recordings                                       |
| <input type="checkbox"/> Difficult reachability of study site                      | <input type="checkbox"/> Concerns about confidentiality                         |
| <input type="checkbox"/> Amount of questionnaires to be completed                  |                                                                                 |
| <input type="checkbox"/> Other(s), namely:                                         |                                                                                 |

---

---

---

**3. What was helpful to participate in the D-CPT trial?**

- |                                                                                 |                                                                      |
|---------------------------------------------------------------------------------|----------------------------------------------------------------------|
| <input type="checkbox"/> Financial compensation for taking part in assessments  | <input type="checkbox"/> Involvement of parents/caregivers           |
| <input type="checkbox"/> Reimbursement of travel costs                          | <input type="checkbox"/> Consistent interviewer at most appointments |
| <input type="checkbox"/> Thank you cards                                        | <input type="checkbox"/> Consistent contact person at the study site |
| <input type="checkbox"/> Certificate after successful completion of the therapy | <input type="checkbox"/> Reminders of appointments                   |
| <input type="checkbox"/> Flexible time scheduling                               | <input type="checkbox"/> Support by friends and/or relatives         |
| <input type="checkbox"/> Other(s), namely:                                      |                                                                      |

---

---

---

**Thank you very much for answering these questions, you've helped us a lot!**
